# Supplementary material
Source: Research Square preprint supplement (doi:10.21203/rs.3.rs-9052710/v1)
Supplement: Supplementary file 1 [file fc72dcdd2c6a7c2729a29632.docx]

**Leveraging primary care data to understand military veteran health in England: Feasibility study and matched-control comparative health profile**

**Authors**

Pamela Almeida-Meza, Alexandru Dregan, Bethany Croak, Shehan Hettiaratchy, Nicola T. Fear, Sharon A.M. Stevelink

| **Supplementary Table 1.** Final list of codes and associated terms used to identify veterans in CPRD Aurum | | | |
| --- | --- | --- | --- |
|  | **Term** | **Branch of Service** | **Definitive term** |
| 1 | Joined military forces | − | **−** |
| 2 | Left military service | − | ✓ |
| 3 | Deserted from military service | − | ✓ |
| 4 | History relating to military service | − | ✓ |
| 5 | Active duty military | − | **−** |
| 6 | Military services member | − | **−** |
| 7 | Aircraft ejection - military | − | **−** |
| 8 | Injury from military training/exercise | − | **−** |
| 9 | Military veteran | − | ✓ |
| 10 | Acute posttraumatic stress disorder following military combat | − | **−** |
| 11 | Chronic post-traumatic stress disorder following military combat | − | **−** |
| 12 | Delayed posttraumatic stress disorder following military combat | − | **−** |
| 13 | Military services member of ground forces | − | **−** |
| 14 | Duration of military service | − | **−** |
| 15 | Military administrative status | − | **−** |
| 16 | Military clerk | − | **−** |
| 17 | Served in military service | − | ✓ |
| 18 | Serving in military service | − | **−** |
| 19 | Exposed to combat during military service | − | **−** |
| 20 | Medically discharged from military service | − | ✓ |
| 21 | Left military service | − | ✓ |
| 22 | History relating to Army service | Army | ✓ |
| 23 | ARMY | Army | **−** |
| 24 | ARMY TRG | Army | **−** |
| 25 | Active serving member of the Army | − | **−** |
| 26 | Active serving member of the Army Reserve | − | **−** |
| 27 | Active serving member of the Army - temporary registration | Army | **−** |
| 28 | Army veteran | Army | ✓ |
| 29 | Army personnel | − | **−** |
| 30 | Army officer | Army | **−** |
| 31 | Royal Army Medical Corps personnel | Army | **−** |
| 32 | Pharmacy technician - Royal Army Medical Corps | Army | **−** |
| 33 | Horse trainer - Royal Army Veterinary Corps | Army | **−** |
| 34 | Veterinary technician - Royal Army Veterinary Corps | Army | **−** |
| 35 | Dog trainer - Royal Army Veterinary Corps | Army | **−** |
| 36 | Army - non-commissioned personnel | Army | **−** |
| 37 | Royal Army Dental Corps personnel | Army | **−** |
| 38 | Royal Army Medical Corps personnel | Army | **−** |
| 39 | History relating to Royal Air Force service | RAF | ✓ |
| 40 | Active serving member of the Royal Air Force - temporary registration | RAF | **−** |
| 41 | Active serving member of the Royal Air Force | RAF | **−** |
| 42 | Active serving member of the Royal Air Force Reserve | RAF | **−** |
| 43 | Royal Air Force veteran | RAF | ✓ |
| 44 | Royal Air Force data analyst | RAF | **−** |
| 45 | Royal Air Force administrative officer, secretarial | RAF | **−** |
| 46 | Royal Air Force musician | RAF | **−** |
| 47 | Royal Air Force student laboratory technician | RAF | **−** |
| 48 | Royal Air Force student dental technician | RAF | **−** |
| 49 | Royal Air Force navigator, general duties | RAF | **−** |
| 50 | Royal Air Force electrical engineering technician, telecommunications | RAF | **−** |
| 51 | Royal Air Force administrative officer, education | RAF | **−** |
| 52 | Princess Mary's Royal Air Force Nursing Service | RAF | **−** |
| 53 | Royal Air Force communications systems voice analyst | RAF | **−** |
| 54 | Royal Air Force student pharmacy technician | RAF | **−** |
| 55 | Royal Air Force statistical analyst, automatic data processing | RAF | **−** |
| 56 | Royal Air Force mechanical transport driver | RAF | **−** |
| 57 | Royal Air Force operations support manager | RAF | **−** |
| 58 | Royal Air Force telecommunications operator | RAF | **−** |
| 59 | Royal Air Force personnel administrator, automatic data processing | RAF | **−** |
| 60 | Royal Air Force student radiographer | RAF | **−** |
| 61 | History relating to Royal Navy service | Navy | ✓ |
| 62 | Active serving member of the Royal Navy - temporary registration | Navy | **−** |
| 63 | Active serving member of the Royal Navy | Navy | **−** |
| 64 | Active serving member of the Royal Navy Reserve | Navy | **−** |
| 65 | Royal Navy veteran | Navy | ✓ |
| 66 | Royal Navy personnel | Navy | **−** |
| 67 | Royal Navy officer | Navy | **−** |
| 68 | Commissioned officer - Royal Navy | Navy | **−** |
| 69 | Commissioned officer medical - Royal Navy | Navy | **−** |
| 70 | Engineer - Royal Navy | Navy | **−** |
| 71 | Marine engineer - Royal Navy | Navy | **−** |
| 72 | Seaman - Royal Navy | Navy | **−** |
| 73 | Merchant navy medical | Navy | **−** |
| 74 | Marine engineer (non-commissioned) - Royal Navy | Navy | **−** |
| 75 | Royal Marines veteran | Navy | ✓ |
| 76 | Signposting to Veterans' Gateway | − | **−** |
| 77 | Served in armed forces in combat | − | ✓ |
| 78 | Served in armed forces in combat | − | ✓ |
| 79 | Trainee - armed forces | − | **−** |
| 80 | Served in armed forces | − | ✓ |
| 81 | Officer, armed forces NOS | − | **−** |
| 82 | Armed forces: non-comissioned | − | **−** |
| 83 | Armed forces | − | **−** |
| 84 | Officer - armed forces | − | **−** |
| 85 | Armed forces NOS | − | **−** |
| 86 | Served in armed forces | − | ✓ |
| 87 | Armed forces reservist | − | **−** |
| 88 | Armed forces: non-commissioned | − | **−** |
| 89 | History of serving in armed forces | − | ✓ |
| 90 | Active serving member of the Royal Marines - temporary registration | Royal Marines | **−** |
| 91 | Active serving member of the Royal Marines | Royal Marines | **−** |
| 92 | Active serving member of the Royal Marines Reserve | Royal Marines | **−** |
| 93 | Royal Marines - non-commissioned personnel | Royal Marines | **−** |
| 94 | Musician - Royal Marines | Royal Marines | **−** |
| 95 | Marine engineer officer | Royal Marines | **−** |
| 96 | Regt/corps/command | **−** | **−** |
| 97 | Finance and systems administrator - Adjutant General's Corps | Army | **−** |
| 98 | Postal and courier operator - Royal Logistics Corps | Army | **−** |
| 99 | Supply controller - Royal Logistics Corps | Army | **−** |
| 100 | Movement controller - Royal Logistics Corps | Army | **−** |
| 101 | Adjutant General's Corps personnel | Army | **−** |
| 102 | Finance and systems administrator - Adjutant General's Corps | Army | **−** |
| 103 | Regimental accountant - Adjutant General's Corps | Army | **−** |
| 104 | Regimental administration officer finance - Adjutant General's Corps | Army | **−** |
| 105 | Royal Logistics Corps personnel | Army | **−** |
| 106 | Royal engineers diver | Army | **−** |
| 107 | Topographic technician - Royal Engineers | Army | **−** |
| 108 | Design draughtsman - Royal Engineers | Army | **−** |
| 109 | Electrical and mechanical draughtsman - Royal Engineers | Army | **−** |
| 110 | Heating, ventilation and air conditioning fitter - Royal Engineers | Army | **−** |
| 111 | Plumber and pipe fitter - Royal Engineers | Army | **−** |
| 112 | Administrative officer - RAF | RAF | **−** |
| 113 | Airman, aircrew - RAF | RAF | **−** |
| 114 | Nurse - RAF | RAF | **−** |
| 115 | Pharmacy technician - RAF | RAF | **−** |
| 116 | Personnel administrator - RAF | RAF | **−** |
| 117 | General mechanic - RAF | RAF | **−** |
| 118 | AIR FORCE | **−** | **−** |
| 119 | Infantry soldier | Army | **−** |
| 120 | Soldier - home service force | Army | **−** |
| 121 | Special Air Services soldier | Army | **−** |

| **Supplementary Table 2.** STROBE checklist for reporting observational studies | | | |
| --- | --- | --- | --- |
| **Item** | **Recommendation** | **Reported** | **Manuscript location** |
| 1a | Indicate the study design in the title or abstract | Yes | Abstract: Methods mentions 'matched cohort study' |
| 1b | Provide informative and balanced abstract | Yes | Structured abstract (Background, Methods, Results, Conclusions) |
| 2 | Explain scientific background and rationale | Yes | Introduction: Paragraphs describing evidence gap in UK veteran health research |
| 3 | State specific objectives or hypotheses | Yes | Introduction: Study aims |
| 4 | Present key elements of study design early | Yes | Methods: Data section |
| 5 | Describe setting, locations, and relevant dates | Yes | Methods: Data (CPRD Aurum, England/Northern Ireland, 1987–2024) |
| 6a | Eligibility criteria and participant selection | Yes | Methods: Study population, veteran identification strategy |
| 6b | Matching criteria and number of exposed/unexposed | Yes | Methods: Selection of comparison group (2:1 matching) |
| 7 | Define outcomes, exposures, confounders | Yes | Methods: Health risk factors and diagnoses |
| 8 | Sources of data and measurement methods | Yes | Methods: Data and primary care data sections |
| 9 | Describe efforts to address bias | Yes | Methods: Matching strategy, validation study; covariate adjustment, discussion limitations |
| 10 | Explain how study size was arrived at | Yes | Methods: Study population, veteran identification strategy and matching |
| 11 | Explain handling of quantitative variables | Yes | Methods: BMI and blood pressure categories |
| 12a | Describe statistical methods and confounding control | Yes | Methods: Matching and covariate adjustment in Poisson regression |
| 12b | Methods for subgroups or interactions | No / Not applicable | Not reported. Feasibility study, interaction analyses were out of scope. |
| 12c | Explain how missing data were addressed | Yes | Methods: Multiple imputation (MICE) |
| 12d | Explain handling of follow‑up or matching | Yes | Methods: Comparison group and follow‑up characteristics |
| 12e | Describe sensitivity analyses | Yes | Methods: Sensitivity analysis section |
| 13a | Report numbers at each study stage | Yes | Results: Veteran identification and matching |
| 13b | Reasons for non-participation | Yes | Methods: Study population; veteran identification strategy and matching |
| 13c | Use of flow diagram | No / Not applicable | Not applicable |
| 14a | Participant characteristics | Yes | Results: Table 1 |
| 14b | Missing data for variables | Yes | Tables 1 and 2 (missing data reported) |
| 14c | Summarise follow‑up time | Yes | Table 1: Follow-up time |
| 15 | Report outcome events or summary measures | Yes | Table 3: Health outcomes |
| 16a | Unadjusted and adjusted estimates with CI | Yes | Table 4: Poisson regression results |
| 16b | Report category boundaries for variables | Yes | Methods: BMI and blood pressure definitions |
| 16c | Translate relative risk to absolute risk (if relevant) | No / Not applicable | Not reported |
| 17 | Report additional analyses | Yes | Results: Sensitivity analyses |
| 18 | Summarise key results | Yes | Discussion: First paragraph |
| 19 | Discuss study limitations | Yes | Discussion: Strengths and limitations |
| 20 | Provide cautious interpretation | Yes | Discussion: Interpretation and literature comparison |
| 21 | Discuss generalisability | Yes | Discussion: Implications and generalisability |
| 22 | Provide funding information | Yes | Declarations: Funding |

| **Supplementary Table 3.** CPRD Aurum sample (veteran and non-veteran) variables descriptives for sample with complete data (n=118,674) | | | | |
| --- | --- | --- | --- | --- |
|  | **Non-veterans**  44,198 | | **Veterans**  74,476 | |
|  | N | % / Median [IQR] / Mean (SD) | N | % / Median [IQR] / Mean (SD) |
| **Gender** |  |  |  |  |
| Men | 31,930 | 72.24 | 58,901 | 79.09 |
| Women | 12,268 | 27.76 | 15,575 | 20.91 |
| **Age at index (years)** |  | 55.63 (19.85) |  | 54.80 (19.92) |
| 18-25 | 3,402 | 7.70 | 6,148 | 8.26 |
| 26-35 | 5,268 | 11.92 | 9,356 | 12.56 |
| 36-45 | 5,792 | 13.10 | 10,362 | 13.91 |
| 46-55 | 7,379 | 16.70 | 12,373 | 16.61 |
| 56-65 | 7,291 | 16.50 | 12,092 | 16.24 |
| 66-75 | 6,094 | 13.79 | 9,929 | 13.33 |
| 76-85 | 6,366 | 14.40 | 9,887 | 13.28 |
| 86-95 | 2,498 | 5.65 | 4,134 | 5.55 |
| 96+ | 108 | 0.24 | 195 | 0.26 |
| **Ethnicity** |  |  |  |  |
| Asian | 1,742 | 3.94 | 1,993 | 2.68 |
| Black | 603 | 1.36 | 1,097 | 1.47 |
| Mixed | 276 | 0.62 | 534 | 0.72 |
| Other | 3,578 | 8.10 | 5,483 | 7.36 |
| White | 37,999 | 85.97 | 65,369 | 87.77 |
| **Year of index** |  |  |  |  |
| 1987-1990 | 142 | 0.32 | 515 | 0.69 |
| 1991-2000 | 838 | 1.90 | 2,651 | 3.56 |
| 2001-2010 | 5,876 | 13.29 | 8,499 | 11.41 |
| 2011-2020 | 29,836 | 67.51 | 45,051 | 60.49 |
| 2021-2024 | 7,506 | 16.98 | 17,760 | 23.85 |
| **Follow-up time (years)*** |  | 3.40 [3.07-7.88] |  | 3.69 [1.72-6.39] |
| **Primary care consultations** |  | 10.32 [6.80-15.74] |  | 11.65 [7.20-18.25] |
| **Mortality** |  |  |  |  |
| Deceased | 4,209 | 9.52 | 7,218 | 9.69 |
| **Region** |  |  |  |  |
| North East | 5,604 | 12.68 | 7,694 | 10.33 |
| North West | 13,199 | 29.86 | 20,225 | 27.16 |
| Yorkshire and the Humber | 1,964 | 4.44 | 3,047 | 4.09 |
| East Midlands | 1,210 | 2.74 | 2,066 | 2.77 |
| West Midlands | 5,334 | 12.07 | 8,787 | 11.80 |
| East of England | 830 | 1.88 | 1,635 | 2.20 |
| London | 1,258 | 2.85 | 2,456 | 3.30 |
| South East | 11,429 | 25.86 | 21,564 | 28.95 |
| South West | 3,338 | 7.55 | 6,948 | 9.33 |
| Northern Ireland | 32 | 0.07 | 54 | 0.07 |
| SD: Standard deviation; IQR: Interquartile Range  Proportions calculated for patients with complete data on variables  *Start date calculated as maximum value between registration date, index date, and protocol start date (01 of January 1987) and end date calculated as minimum value between registration end date, last CPRD collection date for the practice, date of death, or protocol end date (31 of July 2024) | | | | |

| **Supplementary Table 4.** Poisson regression for the association between veteran status and physical and mental health conditions using complete case sample (n=118,674) | | | | | | | | | |
| --- | --- | --- | --- | --- | --- | --- | --- | --- | --- |
|  | **Model 1** | | | **Model 2** | | | **Model 3** | | |
|  | PR | 95% CI | | aPR | 95% CI | | aPR | 95% CI | |
| **Alcohol use disorder** | 1.16 | 1.06 | 1.28 | 1.16 | 1.05 | 1.27 | 1.14 | 1.03 | 1.25 |
| **Alzheimer’s disease** | 1.64 | 1.49 | 1.81 | 1.62 | 1.47 | 1.78 | 1.47 | 1.34 | 1.62 |
| **Anxiety** | 0.95 | 0.92 | 0.99 | 0.95 | 0.92 | 0.99 | 0.95 | 0.91 | 0.98 |
| **Breast cancer** | 0.96 | 0.83 | 1.11 | 0.96 | 0.83 | 1.11 | 0.93 | 0.80 | 1.07 |
| **Coronary heart disease** | 1.01 | 0.97 | 1.05 | 1.01 | 0.97 | 1.05 | 0.97 | 0.93 | 1.01 |
| **Chronic obstructive pulmonary disease** | 1.08 | 1.04 | 1.13 | 1.07 | 1.03 | 1.11 | 1.02 | 0.98 | 1.06 |
| **Depression** | 1.12 | 1.09 | 1.16 | 1.12 | 1.08 | 1.16 | 1.10 | 1.07 | 1.14 |
| **Hearing loss** | 1.23 | 1.18 | 1.28 | 1.22 | 1.17 | 1.27 | 1.18 | 1.14 | 1.23 |
| **Lower back pain** | 0.99 | 0.96 | 1.02 | 0 .99 | 0.96 | 1.02 | 0.98 | 0.95 | 1.00 |
| **Myocardial infarction** | 0.93 | 0.86 | 1.00 | 0.93 | 0.86 | 1.00 | 0.90 | 0.84 | 0.98 |
| **Osteoarthritis** | 1.08 | 1.04 | 1.11 | 1.07 | 1.04 | 1.11 | 1.04 | 1.01 | 1.08 |
| **Prostate cancer*** | 1.03 | 0.96 | 1.12 | 1.02 | 0.94 | 1.10 | 0.97 | 0.89 | 1.05 |
| **Post-traumatic stress disorder** | 8.61 | 7.29 | 10.17 | 8.55 | 7.24 | 10.09 | 8.27 | 7.00 | 9.76 |
| Men patients only (n=90,831)  PR: Prevalence Ratios; aPR:Adjusted Prevalence Ratios; CI: Confidence Interval  Model 1: gender, age, index date and GP practice; Model 2: Model 1 + ethnicity; Model 3: Model 2 + BMI and smoking | | | | | | | | | |

| **Supplementary Table 5**. CPRD Aurum sample (veteran and non-veteran) descriptives for participants identified/registered in 2014 or after (n=286,359) | | | | | |
| --- | --- | --- | --- | --- | --- |
|  |  | **Non-veterans** 190,797 | | **Veterans** 95,562 | |
|  |  | **N** | **% or Mean (SD) [IQR]** | **N** | **% or Mean (SD) [IQR]** |
| **Gender** | |  |  |  |  |
|  | Men | 159,897 | 83.80 | 80,092 | 83.81 |
|  | Women | 30,900 | 16.20 | 15,470 | 16.19 |
| **Age at index** | |  | 55.01 (20.78) |  | 55.01 (20.78) |
|  | 18-25 | 15,530 | 8.14 | 7,782 | 8.14 |
|  | 26-35 | 28,035 | 14.69 | 14,046 | 14.70 |
|  | 36-45 | 25,026 | 13.12 | 12,541 | 13.12 |
|  | 46-55 | 29,837 | 15.64 | 14,945 | 15.64 |
|  | 56-65 | 28,798 | 15.09 | 14,423 | 15.09 |
|  | 66-75 | 22,873 | 11.99 | 11,453 | 11.98 |
|  | 76-85 | 25,786 | 13.51 | 12,909 | 13.51 |
|  | 86-95 | 13,880 | 7.27 | 6,947 | 7.27 |
|  | 96+ | 1,032 | 0.54 | 516 | 0.54 |
| **Ethnicity** | |  |  |  |  |
|  | Asian | 9,205 | 5.43 | 2,131 | 2.34 |
|  | Black | 3,450 | 2.03 | 1,369 | 1.50 |
|  | Mixed | 2,489 | 1.47 | 759 | 0.83 |
|  | Other | 15,015 | 8.86 | 5,634 | 6.17 |
|  | White | 139,399 | 82.21 | 81,355 | 89.16 |
|  | *Missing* | *21,239* | *11.13* | *4,314* | *4.51* |
| **Year of index** | |  |  |  |  |
|  | 2014-2020 | 124,288 | 65.14 | 62,215 | 65.10 |
|  | 2021-2024 | 66,509 | 34.86 | 33,347 | 34.90 |
| **Follow-up time (years)*** | |  | 2.73 [1.11-5.09] |  | 2.49 [1.11-4.70] |
| **Primary care consultations** | |  | 6.66 [4.22-11.00] |  | 10.11 [6.00-16.46] |
| **Mortality** | |  |  |  |  |
|  | Deceased | 9,112 | 4.78 | 8,912 | 9.33 |
| **Year of death** | |  |  |  |  |
|  | 2014-2020 | 5,046 | 55.38 | 3,503 | 39.31 |
|  | 2021-2024 | 4,066 | 44.62 | 5,409 | 60.69 |
| **Region** | |  |  |  |  |
|  | North East | 18,349 | 9.62 | 9,183 | 9.61 |
|  | North West | 52,999 | 27.78 | 26,591 | 27.83 |
|  | Yorkshire and the Humber | 6,391 | 3.35 | 3,197 | 3.35 |
|  | East Midlands | 5,364 | 2.81 | 2,685 | 2.81 |
|  | West Midlands | 20,923 | 10.97 | 10,474 | 10.96 |
|  | East of England | 4,169 | 2.19 | 2,087 | 2.18 |
|  | London | 5,634 | 2.95 | 2,818 | 2.95 |
|  | South East | 57,605 | 30.19 | 28,837 | 30.18 |
|  | South West | 19,193 | 10.06 | 9,605 | 10.05 |
|  | Northern Ireland | 170 | 0.09 | 85 | 0.09 |
| Category percentages are based on complete cases; missing percentages are based on the full sample.  SD: Standard deviation; IQR: Interquartile Range  *Start date calculated as maximum value between registration date, index date, and protocol start date (01 of January 1987) and end date calculated as minimum value between registration end date, last CPRD collection date for the practice, date of death, or protocol end date (31 of July 2024). | | | | | |

| **Supplementary Table 6.** CPRD Aurum sample (veteran and non-veteran) health risk factors for participants identified/registered in 2014 or after (n=286,359) | | | | | | | | | | | | | | | |
| --- | --- | --- | --- | --- | --- | --- | --- | --- | --- | --- | --- | --- | --- | --- | --- |
|  |  | **Non-veterans 206,381** | | | | | | | **Veterans 103,366** | | | | | | |
|  |  | **N** | **%** | **95% CI*** | | **%** | **95% CI**† | | **N** | **%** | **95% CI*** | | **%** | **95% CI**† | |
| **Smoker** |  |  |  |  |  |  |  |  |  |  |  |  |  |  |  |
|  | Never | 39,125 | 51.42 | 51.06 | 51.77 | 53.97 | 53.65 | 54.28 | 33,672 | 45.59 | 45.23 | 45.95 | 46.34 | 45.97 | 46.72 |
|  | Ex-smoker | 22,308 | 29.32 | 28.99 | 29.64 | 27.72 | 27.39 | 28.05 | 26,833 | 36.33 | 35.98 | 36.68 | 35.55 | 35.16 | 35.93 |
|  | Smoker | 14,663 | 19.27 | 18.99 | 19.55 | 18.31 | 18.00 | 18.62 | 13,359 | 18.09 | 17.81 | 18.37 | 18.11 | 17.86 | 18.36 |
|  | *Missing* | *114,701* | *60.12* | *-* | *-* | *-* | *-* | *-* | *21,698* | *22.71* | *-* | *-* | *-* | *-* | *-* |
| **Blood pressure** |  |  |  |  |  |  |  |  |  |  |  |  |  |  |  |
|  | Normal | 15,957 | 19.29 | 19.02 | 19.56 | 19.66 | 19.30 | 20.02 | 11,773 | 17.31 | 17.03 | 17.60 | 18.20 | 17.91 | 18.48 |
|  | Pre-hypertension | 39,252 | 47.45 | 47.11 | 47.79 | 48.09 | 47.74 | 48.43 | 33,177 | 48.78 | 48.40 | 49.15 | 48.84 | 48.47 | 49.21 |
|  | Hypertension | 27,511 | 33.26 | 32.94 | 33.58 | 32.25 | 31.89 | 32.62 | 23,065 | 33.91 | 33.56 | 34.27 | 32.97 | 32.60 | 33.33 |
|  | *Missing* | *108,077* | *56.65* | *-* | *-* | *-* | *-* | *-* | *27,547* | *28.83* | *-* | *-* | *-* | *-* | *-* |
| **BMI** |  |  |  |  |  |  |  |  |  |  |  |  |  |  |  |
|  | Underweight | 3,325 | 5.24 | 5.07 | 5.41 | 4.27 | 4.11 | 4.44 | 861 | 1.37 | 1.28 | 1.46 | 2.00 | 1.87 | 2.13 |
|  | Normal weight | 17,235 | 27.14 | 26.80 | 27.49 | 29.09 | 28.78 | 29.41 | 17,009 | 27.05 | 26.70 | 27.40 | 27.05 | 26.74 | 27.37 |
|  | Overweight | 22,381 | 35.25 | 34.88 | 35.62 | 36.62 | 36.24 | 36.99 | 24,618 | 39.15 | 38.77 | 39.53 | 38.47 | 38.11 | 38.83 |
|  | Obesity class I | 13,097 | 20.63 | 20.31 | 20.94 | 19.75 | 19.36 | 20.14 | 13,770 | 21.90 | 21.58 | 22.22 | 21.70 | 21.36 | 22.03 |
|  | ≥Obesity class II | 7,461 | 11.75 | 11.50 | 12.00 | 10.27 | 10.06 | 10.48 | 6,628 | 10.54 | 10.30 | 10.78 | 10.78 | 10.52 | 11.05 |
|  | *Missing* | *127,298* | *66.72* | *-* | *-* | *-* | *-* | *-* | *32,676* | *34.19* | *-* | *-* | *-* | *-* | *-* |
| Category percentages are based on complete cases; missing percentages are based on the full sample.  *Proportions calculated for patients with complete data on variables  †Pooled proportions obtained using multiple imputed datasets | | | | | | | | | | | | | | | |

| **Supplementary Table 7.** CPRD Aurum sample (veteran and non-veteran) mental and physical health profile for participants identified/registered in 2014 or after (n=286,359) | | | | | | | | | |
| --- | --- | --- | --- | --- | --- | --- | --- | --- | --- |
|  | | **Non-veterans** | | | | **Veterans** | | | |
|  | | **N** | **%** | **95% CI** | | **N** | **%** | **95% CI** | |
| **Alcohol use disorder** | | 1,174 | 0.62 | 0.58 | 0.65 | 1,284 | 1.34 | 1.27 | 1.42 |
| **Alzheimer’s disease** | | 1,119 | 0.59 | 0.55 | 0.62 | 1,827 | 1.91 | 1.83 | 2.00 |
| **Anxiety** | | 10,496 | 5.50 | 5.40 | 5.60 | 7,189 | 7.52 | 7.36 | 7.69 |
| **Breast cancer** | | 337 | 0.18 | 0.16 | 0.20 | 227 | 0.24 | 0.21 | 0.27 |
| **CHD** | | 4,259 | 2.23 | 2.17 | 2.30 | 4,795 | 5.02 | 4.88 | 5.16 |
| **COPD** | | 4,840 | 2.54 | 2.47 | 2.61 | 5,474 | 5.73 | 5.58 | 5.88 |
| **Depression** | | 9,928 | 5.20 | 5.10 | 5.30 | 8,622 | 9.02 | 8.84 | 9.21 |
| **Hearing loss** | | 5,163 | 2.71 | 2.63 | 2.78 | 6,210 | 6.50 | 6.34 | 6.66 |
| **Lower Back Pain** | | 10,471 | 5.49 | 5.39 | 5.59 | 9,068 | 9.49 | 9.30 | 9.68 |
| **Myocardial Infarction** | | 1,528 | 0.80 | 0.76 | 0.84 | 1,558 | 1.63 | 1.55 | 1.71 |
| **Osteoarthritis** | | 7,391 | 3.87 | 3.79 | 3.96 | 8,095 | 8.47 | 8.30 | 8.65 |
| **Prostate cancer*** | | 1,741 | 1.09 | 1.04 | 1.14 | 1,924 | 2.40 | 2.30 | 2.51 |
| **PTSD** | | 339 | 0.18 | 0.16 | 0.20 | 2,935 | 3.07 | 2.96 | 3.18 |
| **Multimorbidity** | |  |  |  |  |  |  |  |  |
|  | 1 condition | 24,718 | 63.55 | 63.07 | 64.03 | 21,520 | 59.03 | 58.52 | 59.53 |
|  | 2 conditions | 10,655 | 27.39 | 26.95 | 27.84 | 10,090 | 27.67 | 27.22 | 28.14 |
|  | 3 conditions | 2,725 | 7.01 | 6.76 | 7.26 | 3,537 | 9.70 | 9.40 | 10.01 |
|  | 4 or more conditions | 796 | 2.05 | 1.91 | 2.19 | 1,312 | 3.60 | 3.41 | 3.79 |
| *Men patients only (n=239,989)  CHD: Coronary Heart Disease; COPD: Chronic obstructive pulmonary disease; PTSD: Post-traumatic stress disorder; BMI: Body mass index. | | | | | | | | | |

| **Supplementary Table 8.** Poisson regression for the association between veteran status and physical and mental health conditions for participants identified/registered in 2014 or after (n=286,359) | | | | | | | | | |
| --- | --- | --- | --- | --- | --- | --- | --- | --- | --- |
|  | **Model 1** | | | **Model 2** | | | **Model 3** | | |
|  | PR | 95% CI | | aPR | 95% CI | | aPR | 95% CI | |
| **Alcohol use disorder** | 2.18 | 2.01 | 2.36 | 2.10 | 1.94 | 2.27 | 2.08 | 1.92 | 2.26 |
| **Alzheimer’s disease** | 3.25 | 3.02 | 3.51 | 3.10 | 2.88 | 3.34 | 3.09 | 2.86 | 3.33 |
| **Anxiety** | 1.36 | 1.32 | 1.40 | 1.33 | 1.29 | 1.37 | 1.33 | 1.29 | 1.37 |
| **Breast cancer** | 1.34 | 1.13 | 1.59 | 1.31 | 1.11 | 1.56 | 1.31 | 1.10 | 1.55 |
| **Coronary heart disease** | 2.24 | 2.15 | 2.34 | 2.16 | 2.07 | 2.25 | 2.01 | 1.92 | 2.09 |
| **Chronic obstructive pulmonary disease** | 2.25 | 2.17 | 2.34 | 2.15 | 2.07 | 2.24 | 1.96 | 1.89 | 2.04 |
| **Depression** | 1.73 | 1.68 | 1.78 | 1.68 | 1.64 | 1.73 | 1.67 | 1.62 | 1.72 |
| **Hearing loss** | 2.40 | 2.31 | 2.48 | 2.31 | 2.22 | 2.39 | 2.24 | 2.16 | 2.32 |
| **Lower back pain** | 1.72 | 1.68 | 1.77 | 1.70 | 1.65 | 1.75 | 1.65 | 1.60 | 1.69 |
| **Myocardial infarction** | 2.03 | 1.89 | 2.18 | 1.95 | 1.81 | 2.09 | 1.83 | 1.70 | 1.96 |
| **Osteoarthritis** | 2.18 | 2.12 | 2.25 | 2.10 | 2.04 | 2.17 | 1.99 | 1.93 | 2.06 |
| **Prostate cancer*** | 2.20 | 2.06 | 2.35 | 2.10 | 1.97 | 2.24 | 2.00 | 1.88 | 2.14 |
| **Post-traumatic stress disorder** | 17.28 | 15.45 | 19.33 | 17.05 | 15.24 | 19.07 | 16.93 | 15.13 | 18.94 |
| *Men patients only (n=239,989)  PR: Prevalence Ratios; aPR:Adjusted Prevalence Ratios; CI: Confidence Interval  Model 1: Gender, age, index date, and GP practice; Model 2: Model 1 + ethnicity; Model 3: Model 2 + BMI and smoking | | | | | | | | | |

**Sent:**

10 patient IDs (5 veterans and 5 non-veterans) sent to 50 practices (50% had veteran friendly accreditation)

**Received:**

95 patients from 10 practices (70% veteran friendly)

34 (15 veterans and 19 non-veterans from 9 practices) did not have access to patient data (patient had left practice or died)

**Valid responses:**

61 patients

**Supplementary Figure 1.** Flowchart of CPRD data sent to PROVE and GP data received
